# Supplementary material for: A unified Symmetry Framework for Spin–Ferroelectric Coupling in Altermagnetic Multiferroics
Source: Research Square preprint supplement (doi:10.21203/rs.3.rs-8045133/v1), 2025-11-18
Supplement: Supplementary file 1 [file 21fc063e0d4f1d5634d4fa6a.docx]

**Supplementary Information for**

**A unified Symmetry Framework for Spin–Ferroelectric Coupling in Altermagnetic Multiferroics**

Wei Sun1, Wenxuan Wang2*, Changhong Yang, Shifeng Huang1*, Zhenxiang Cheng3*

1 Shandong Provincial Key Laboratory of Preparation and Measurement of Building Materials, University of Jinan, Jinan, 250022, China

2 School of Material Science and Engineering, University of Jinan, Jinan, 250022, Shandong, China

3 Institute for Superconducting & Electronic Materials, Faculty of Engineering and Information Sciences, University of Wollongong, Innovation Campus, Squires Way, North Wollongong, NSW 2500, Australia

* Corresponding Author

**Part 1. The electronic and** **magnetic properties of MnPS3 monolayer.**


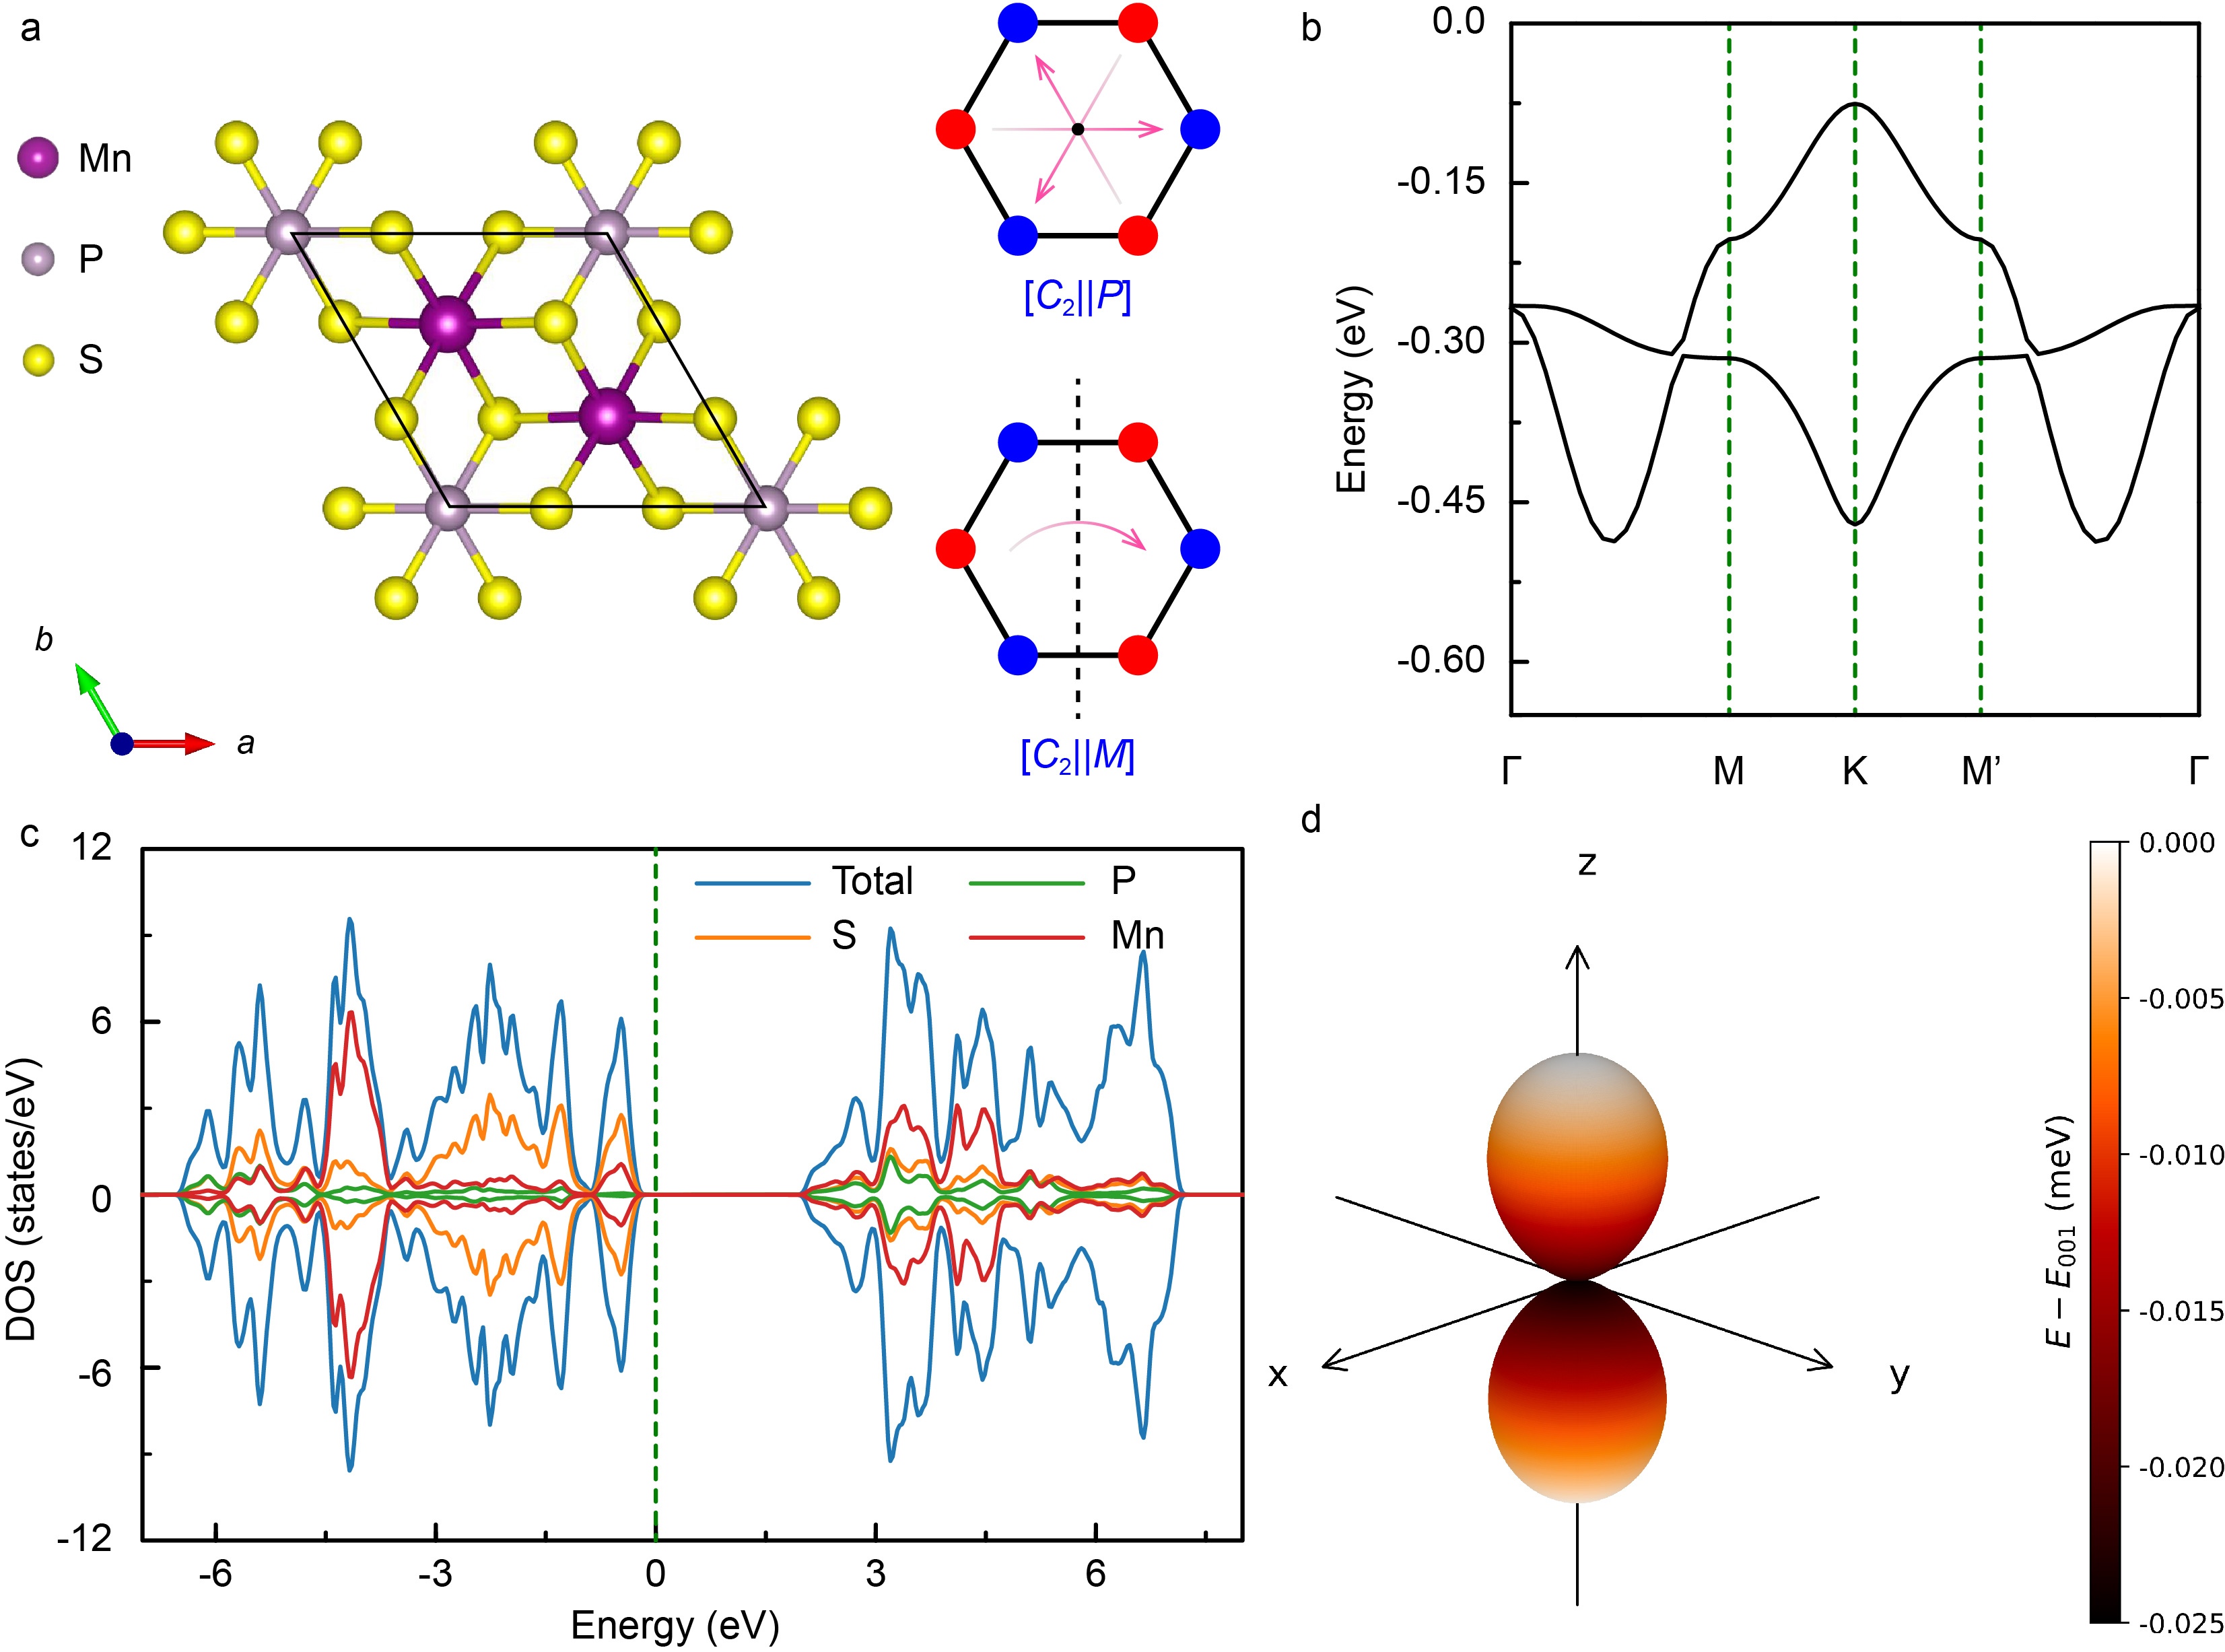


Fig. S1. (a) The top view of the monolayer MnPS3 structure with a lattice constant of 6.046 Å, exhibiting [C2||*P*] and [C2||*M*] symmetries. Among these, the [C2||*P*] symmetry-protected system exhibits (b) a spin-degenerate antiferromagnetic band structure. (c) represents the density of states of monolayer MnPS3. (d) displays the magnetic anisotropy energy, indicating easy-plane anisotropy.

**Part 2. Differential charge distribution of MnPS3 bilayer.**


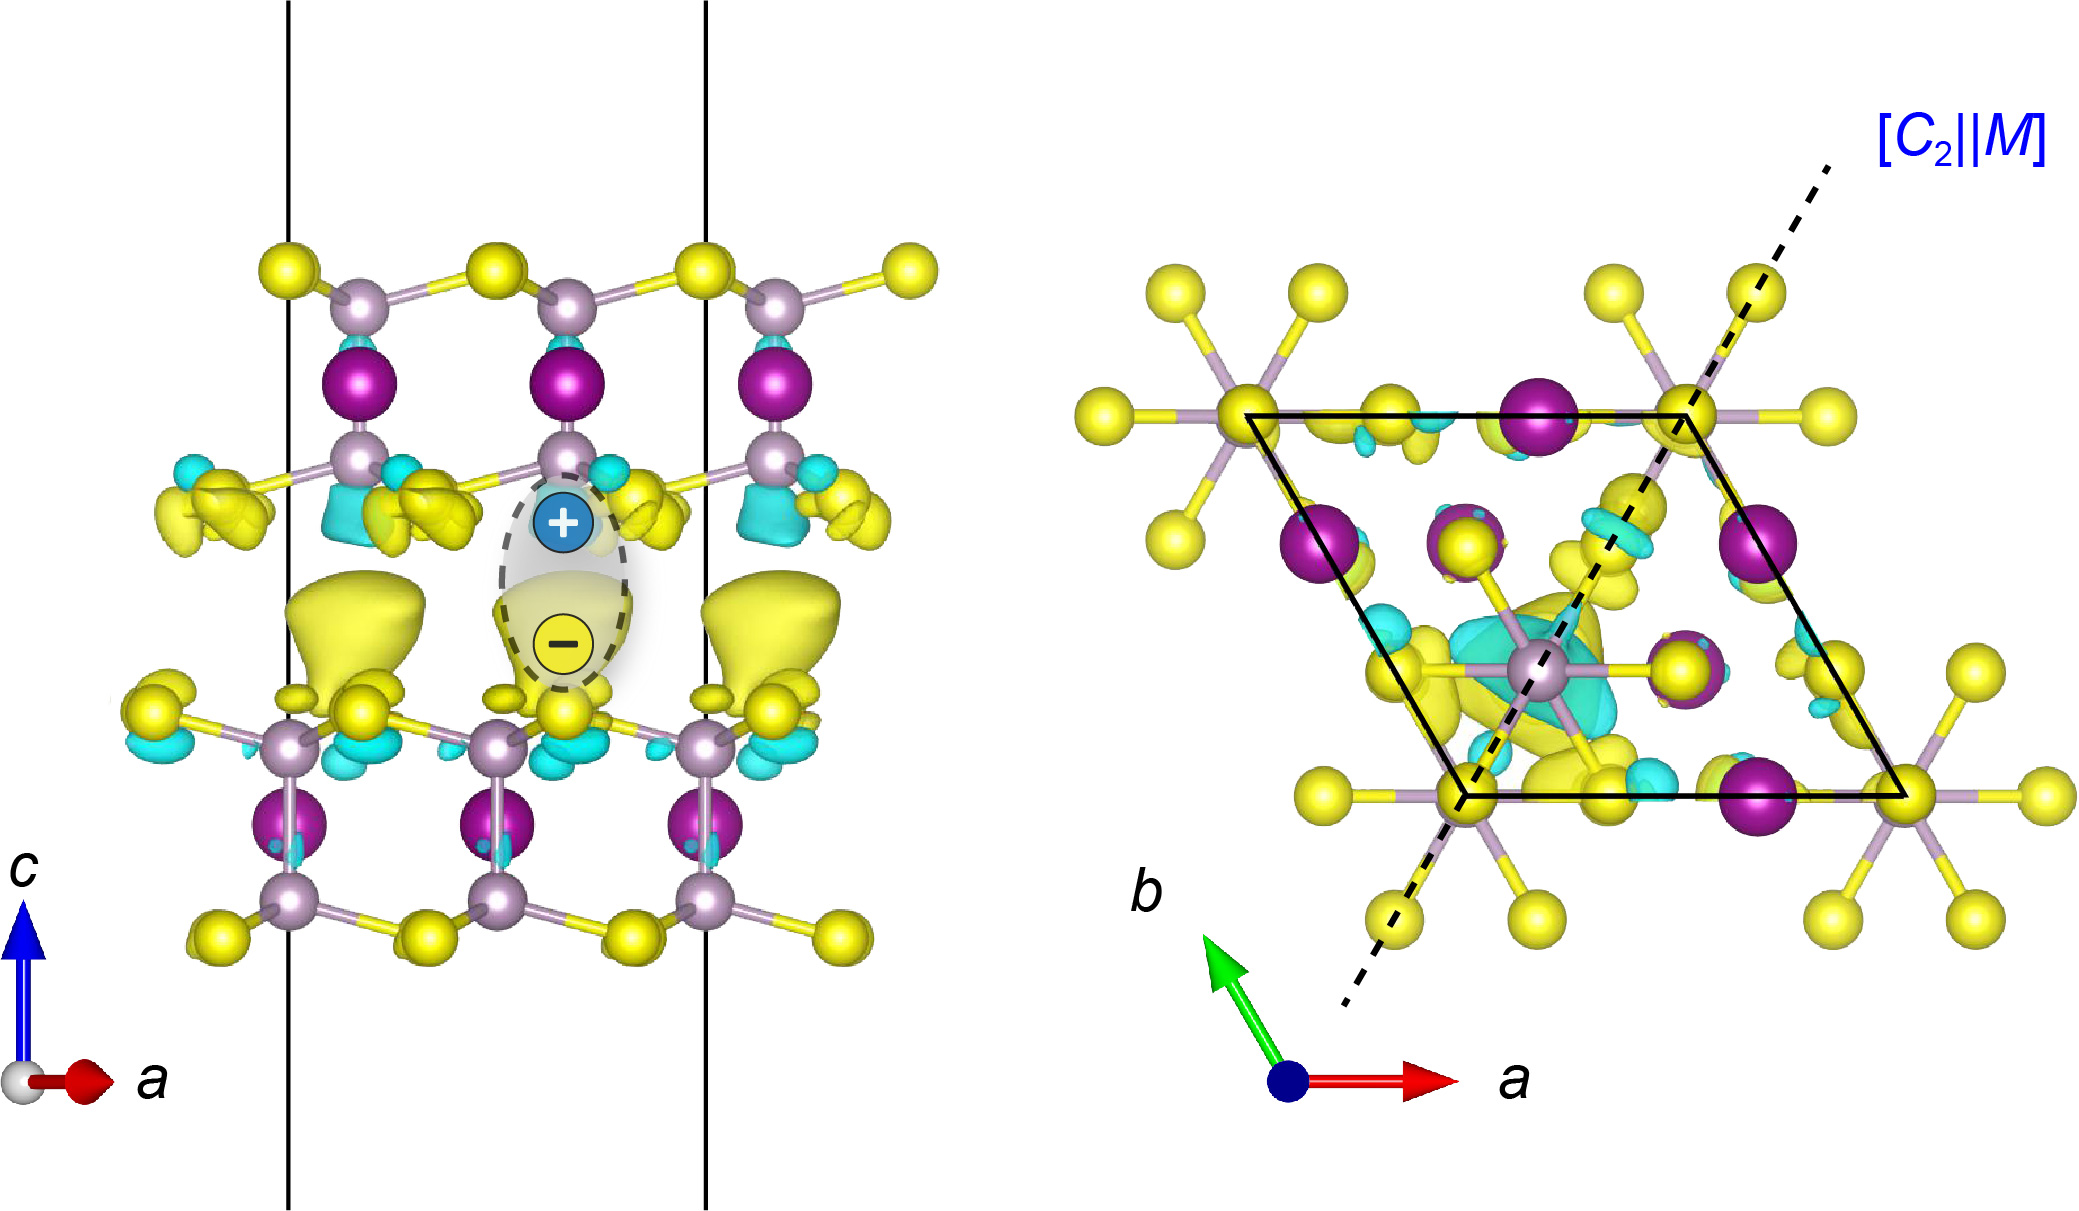


Fig. S2. Differential charge distribution of MnPS3 bilayer at τo = (*a*/3, *b*/3). The side view clearly shows electron accumulation at the interfacial S atoms and depletion around the P atoms, establishing a vertical out-of-plane dipole moment. In the in-plane direction, mirror symmetry *M* enforces a symmetric distribution on both sides, thereby aligning the polarization direction with the mirror plane.

**Part 3. The electronic structure of MnPS3 bilayer.**


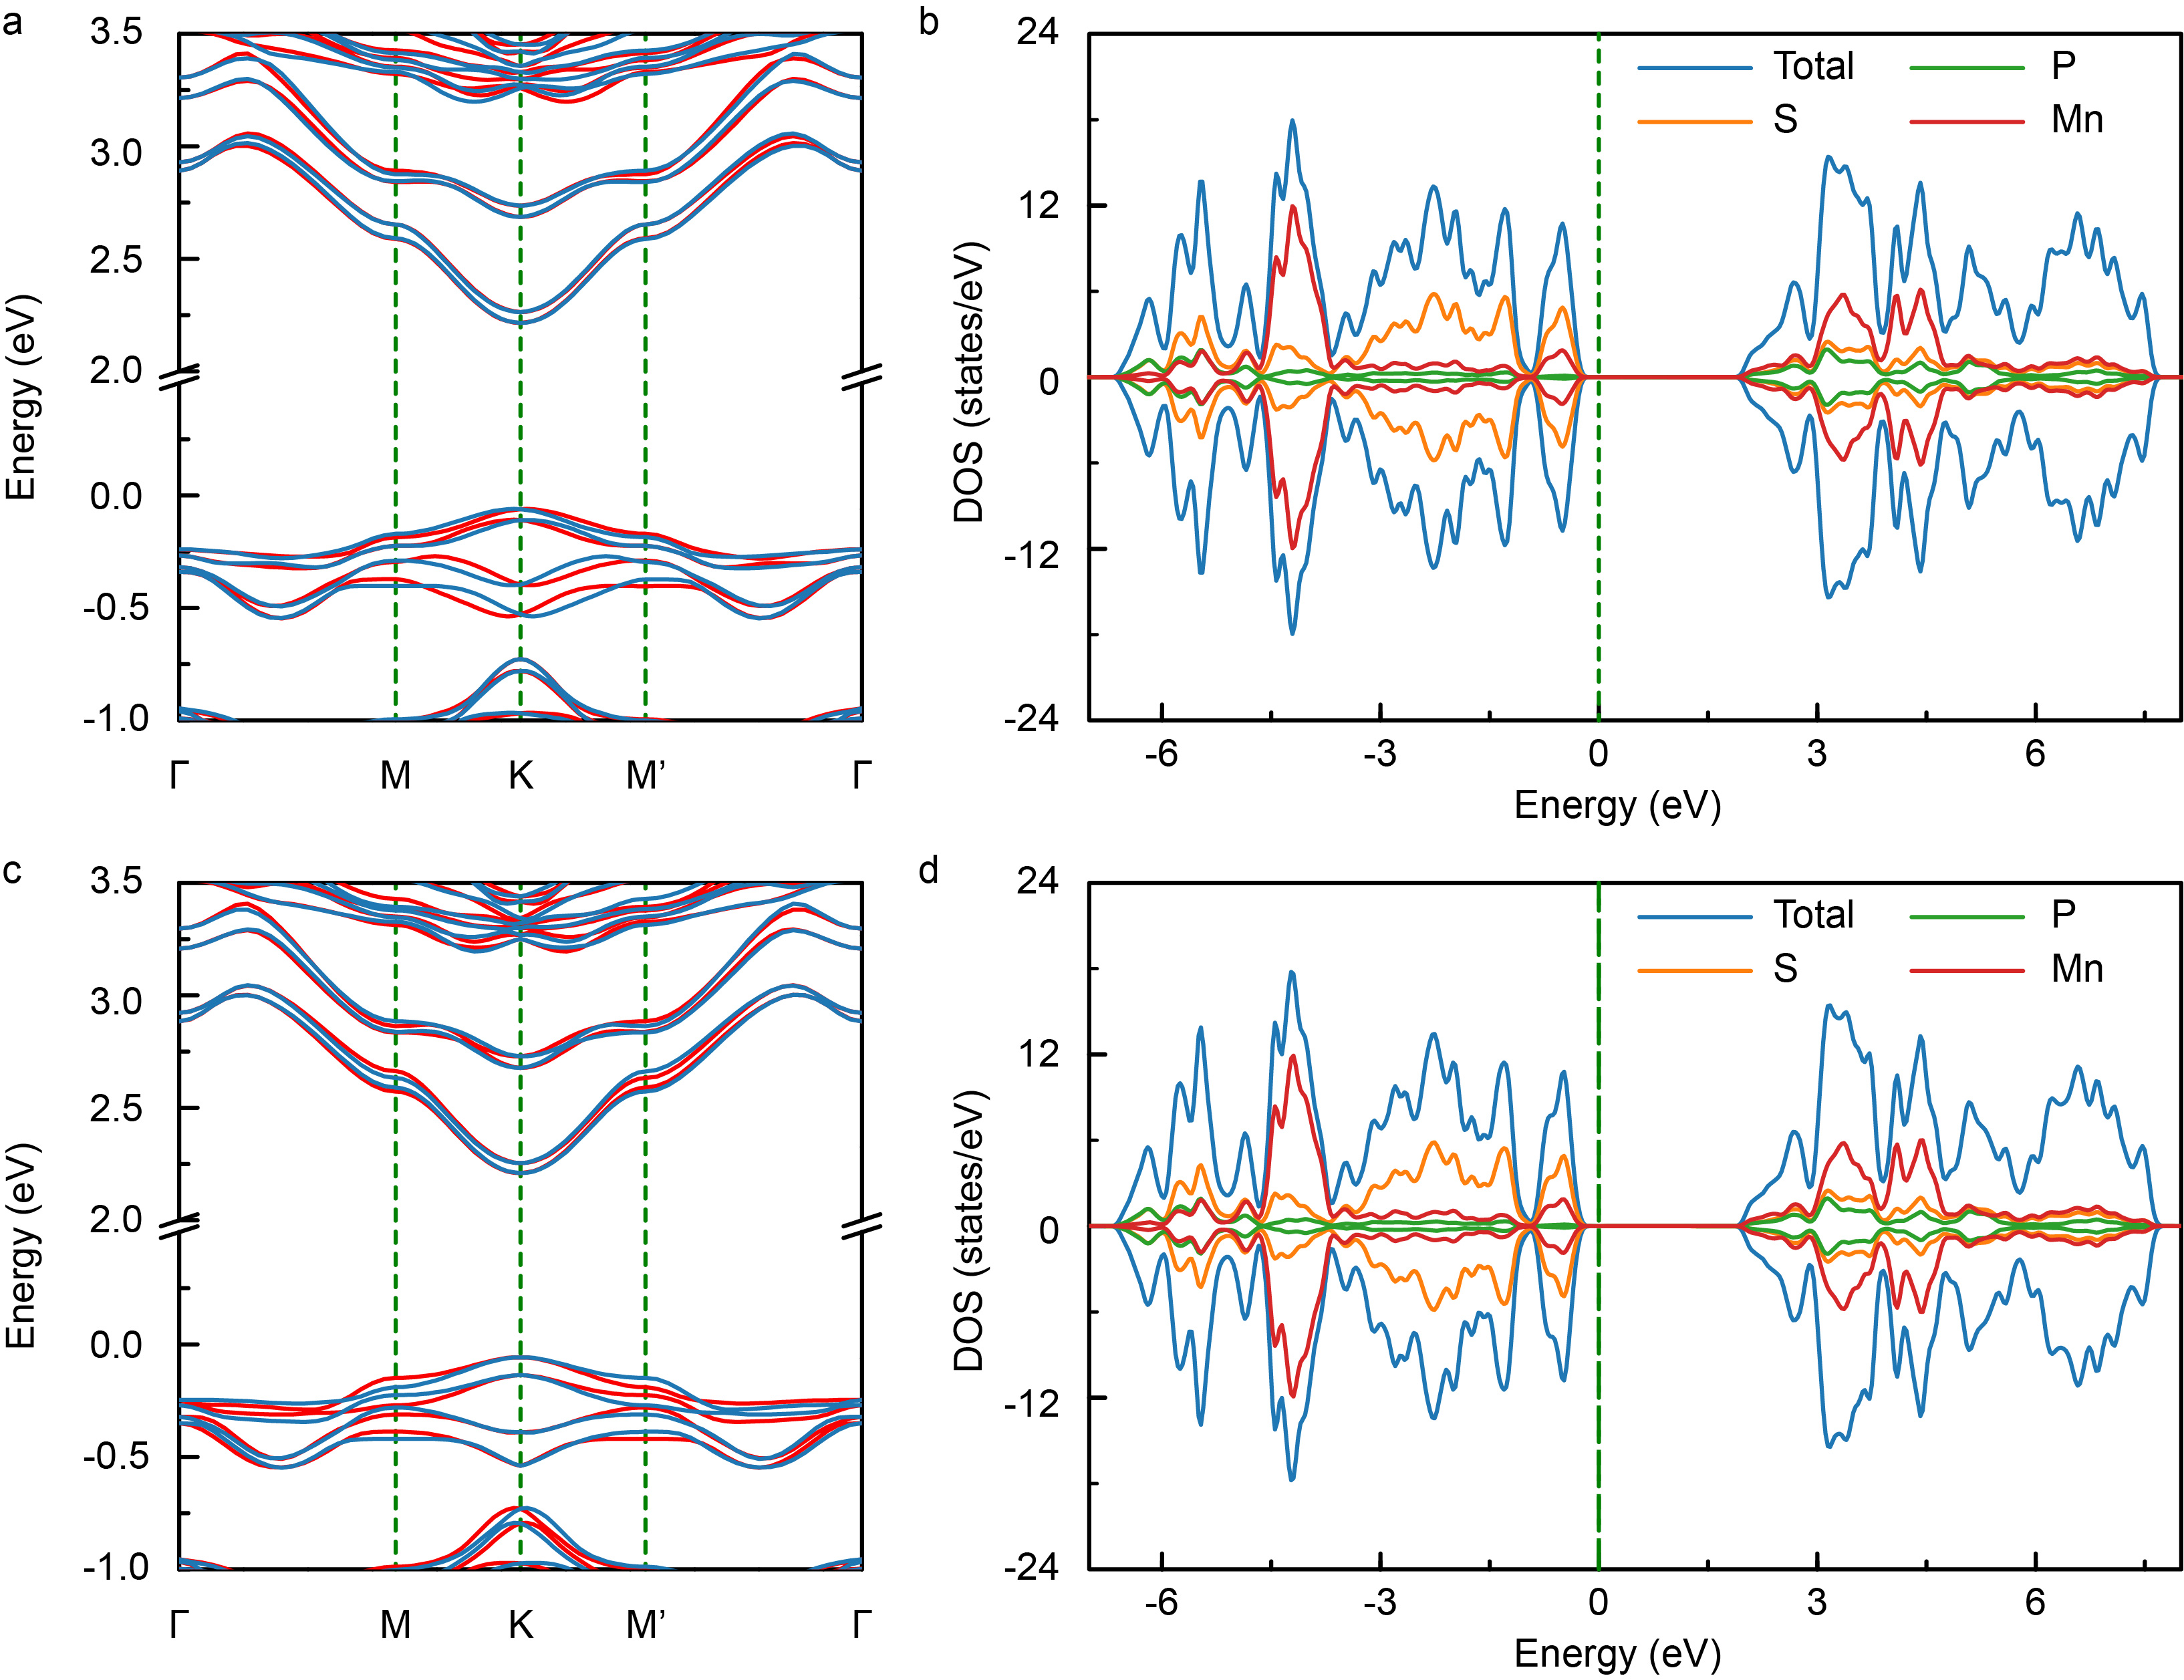


Fig. S3. Panels (a) and (b) respectively correspond to the band structure and density of states (DOS) for the MnPS3 bilayer with **L**1 magnetic ordering; panels (c) and (d) show the counterparts for the **L**2 magnetic ordering. The observed similarity in electronic structures between the two orders is indicative of weak interlayer coupling.

**Part 4. Band switching during the ferroelectric transition along path 3.**


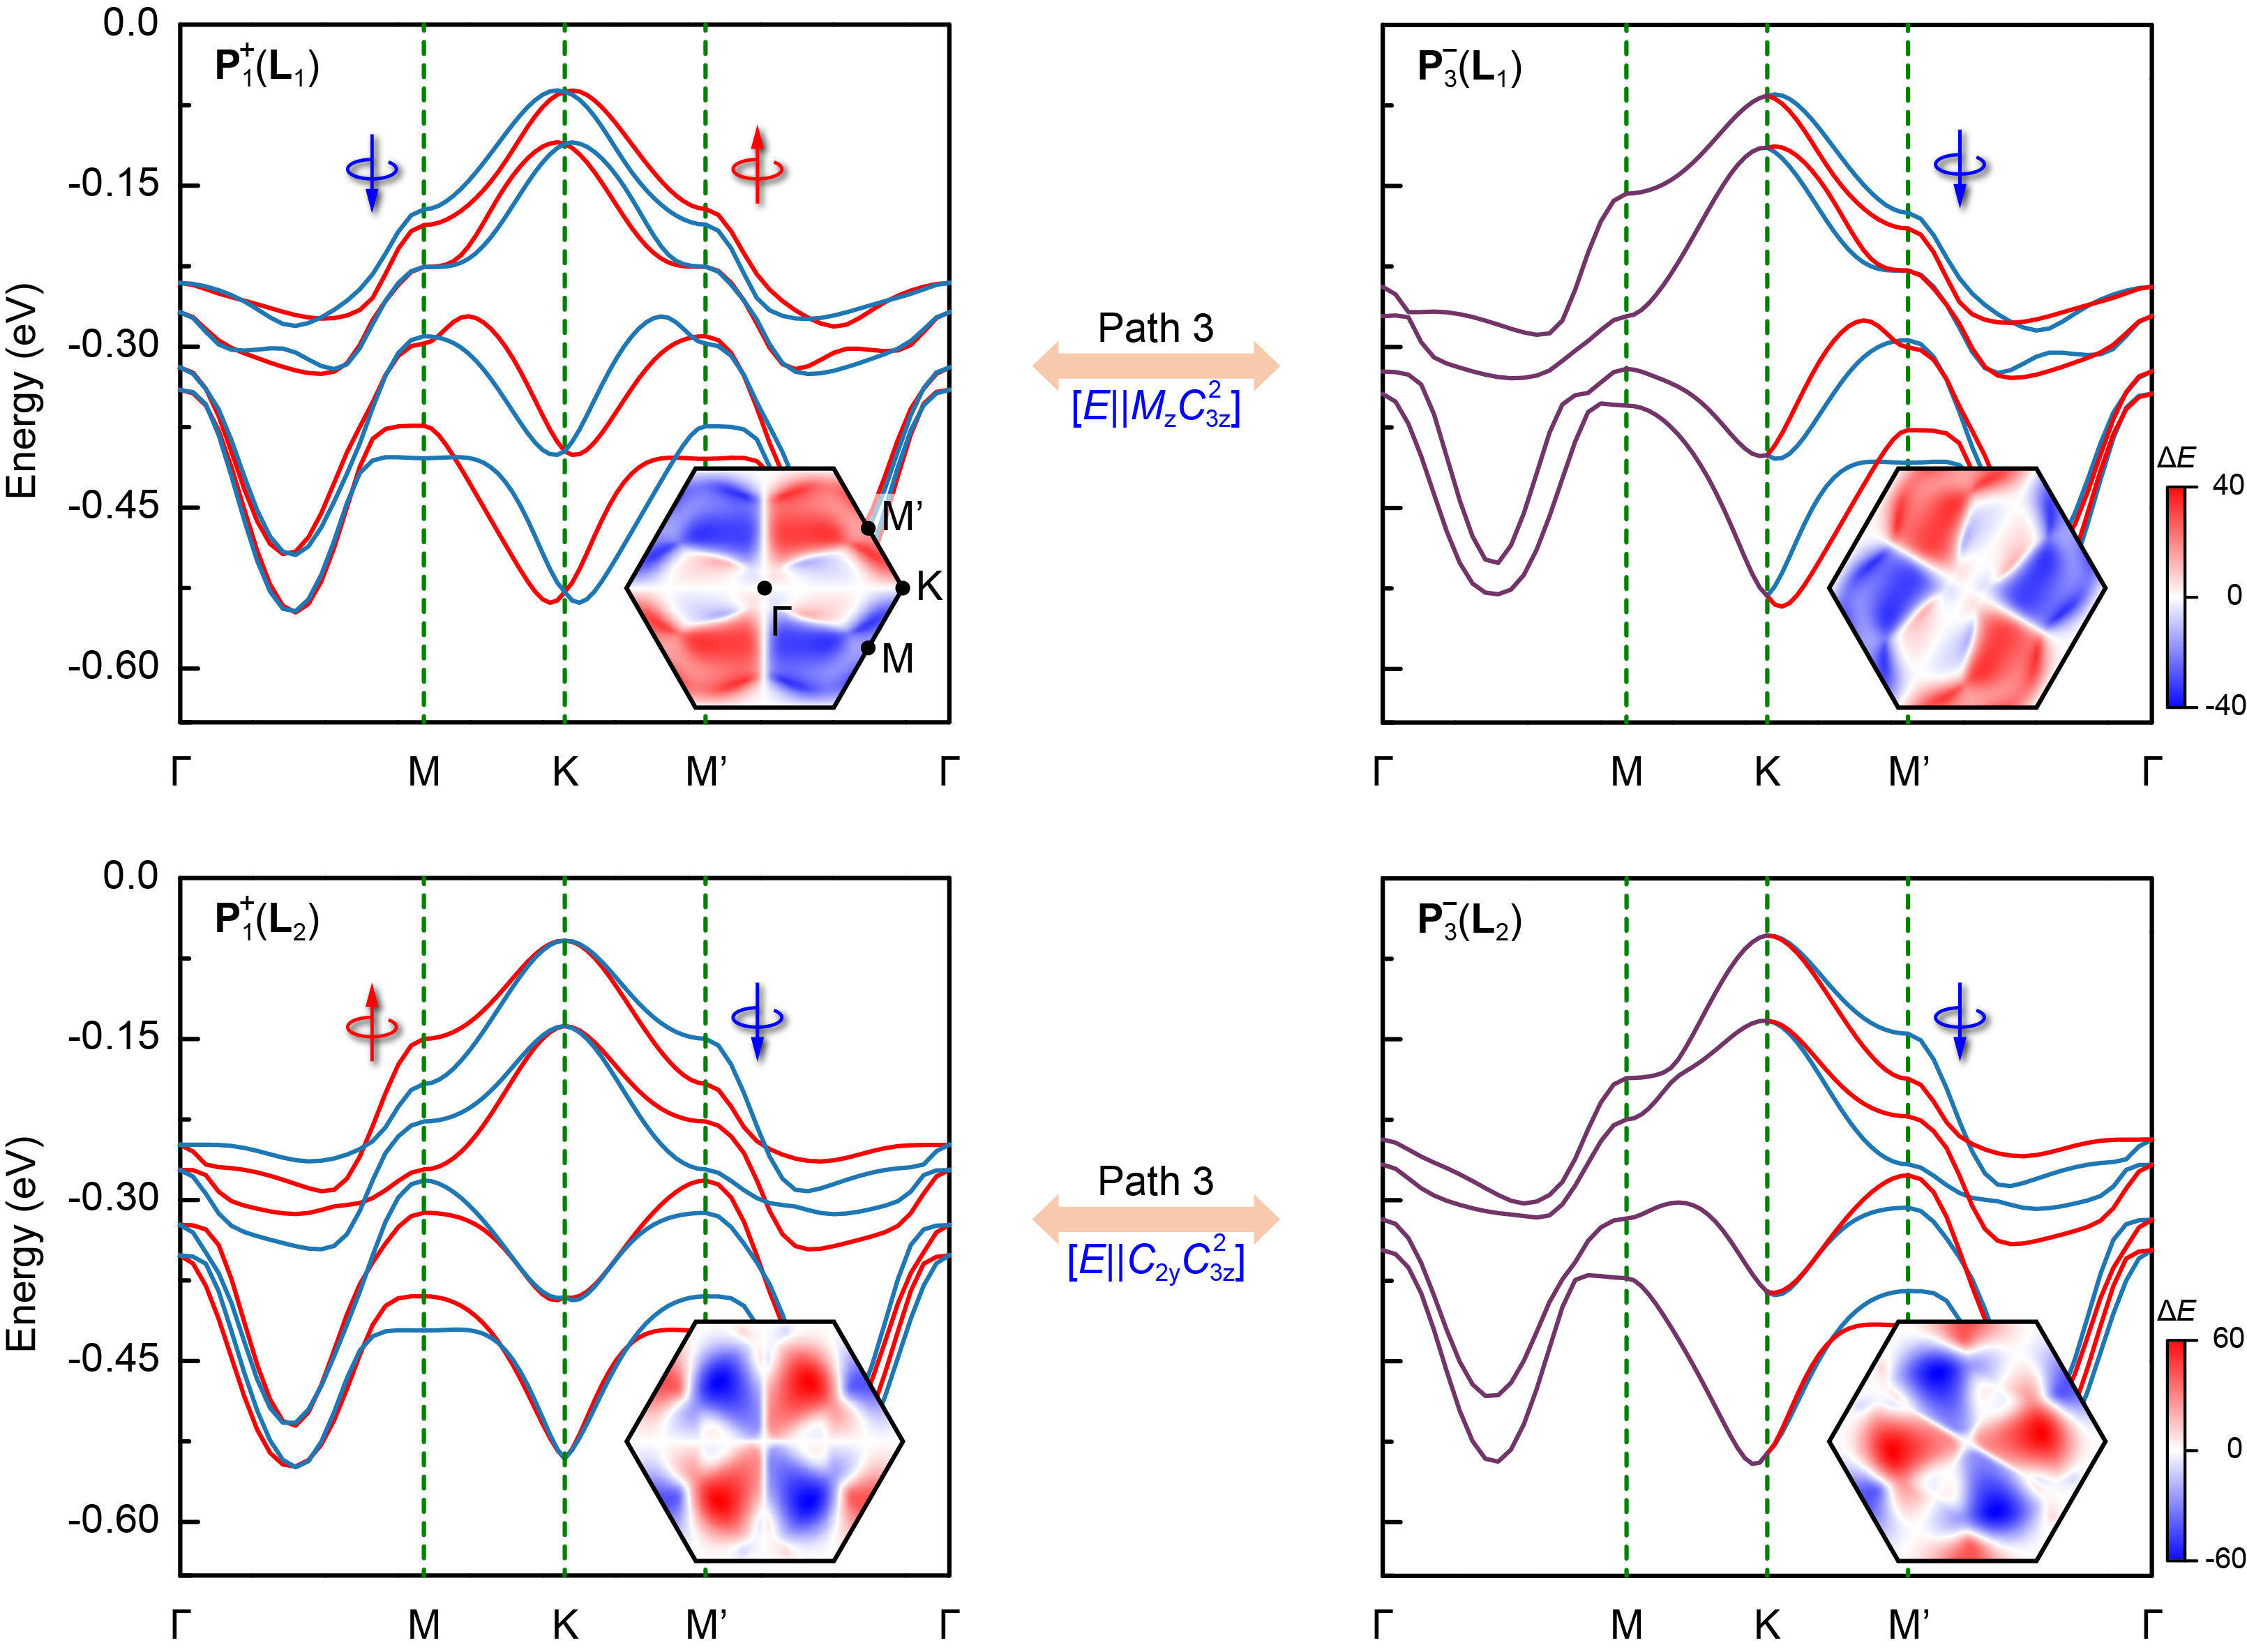


Fig. S4. Band switching during the ferroelectric transition along Path 3 for the **L**1 and **L**2 magnetic orderings. Similar to Path 2, this process involves an additional symmetry operation, it induces a Type III — non-symmetric mapping, geometrically rotating the momentum-space spin texture by 2π/3.

**Part 5. Influence of ferroelectric switching along path 3 on the spin-resolved charge conductivity.**


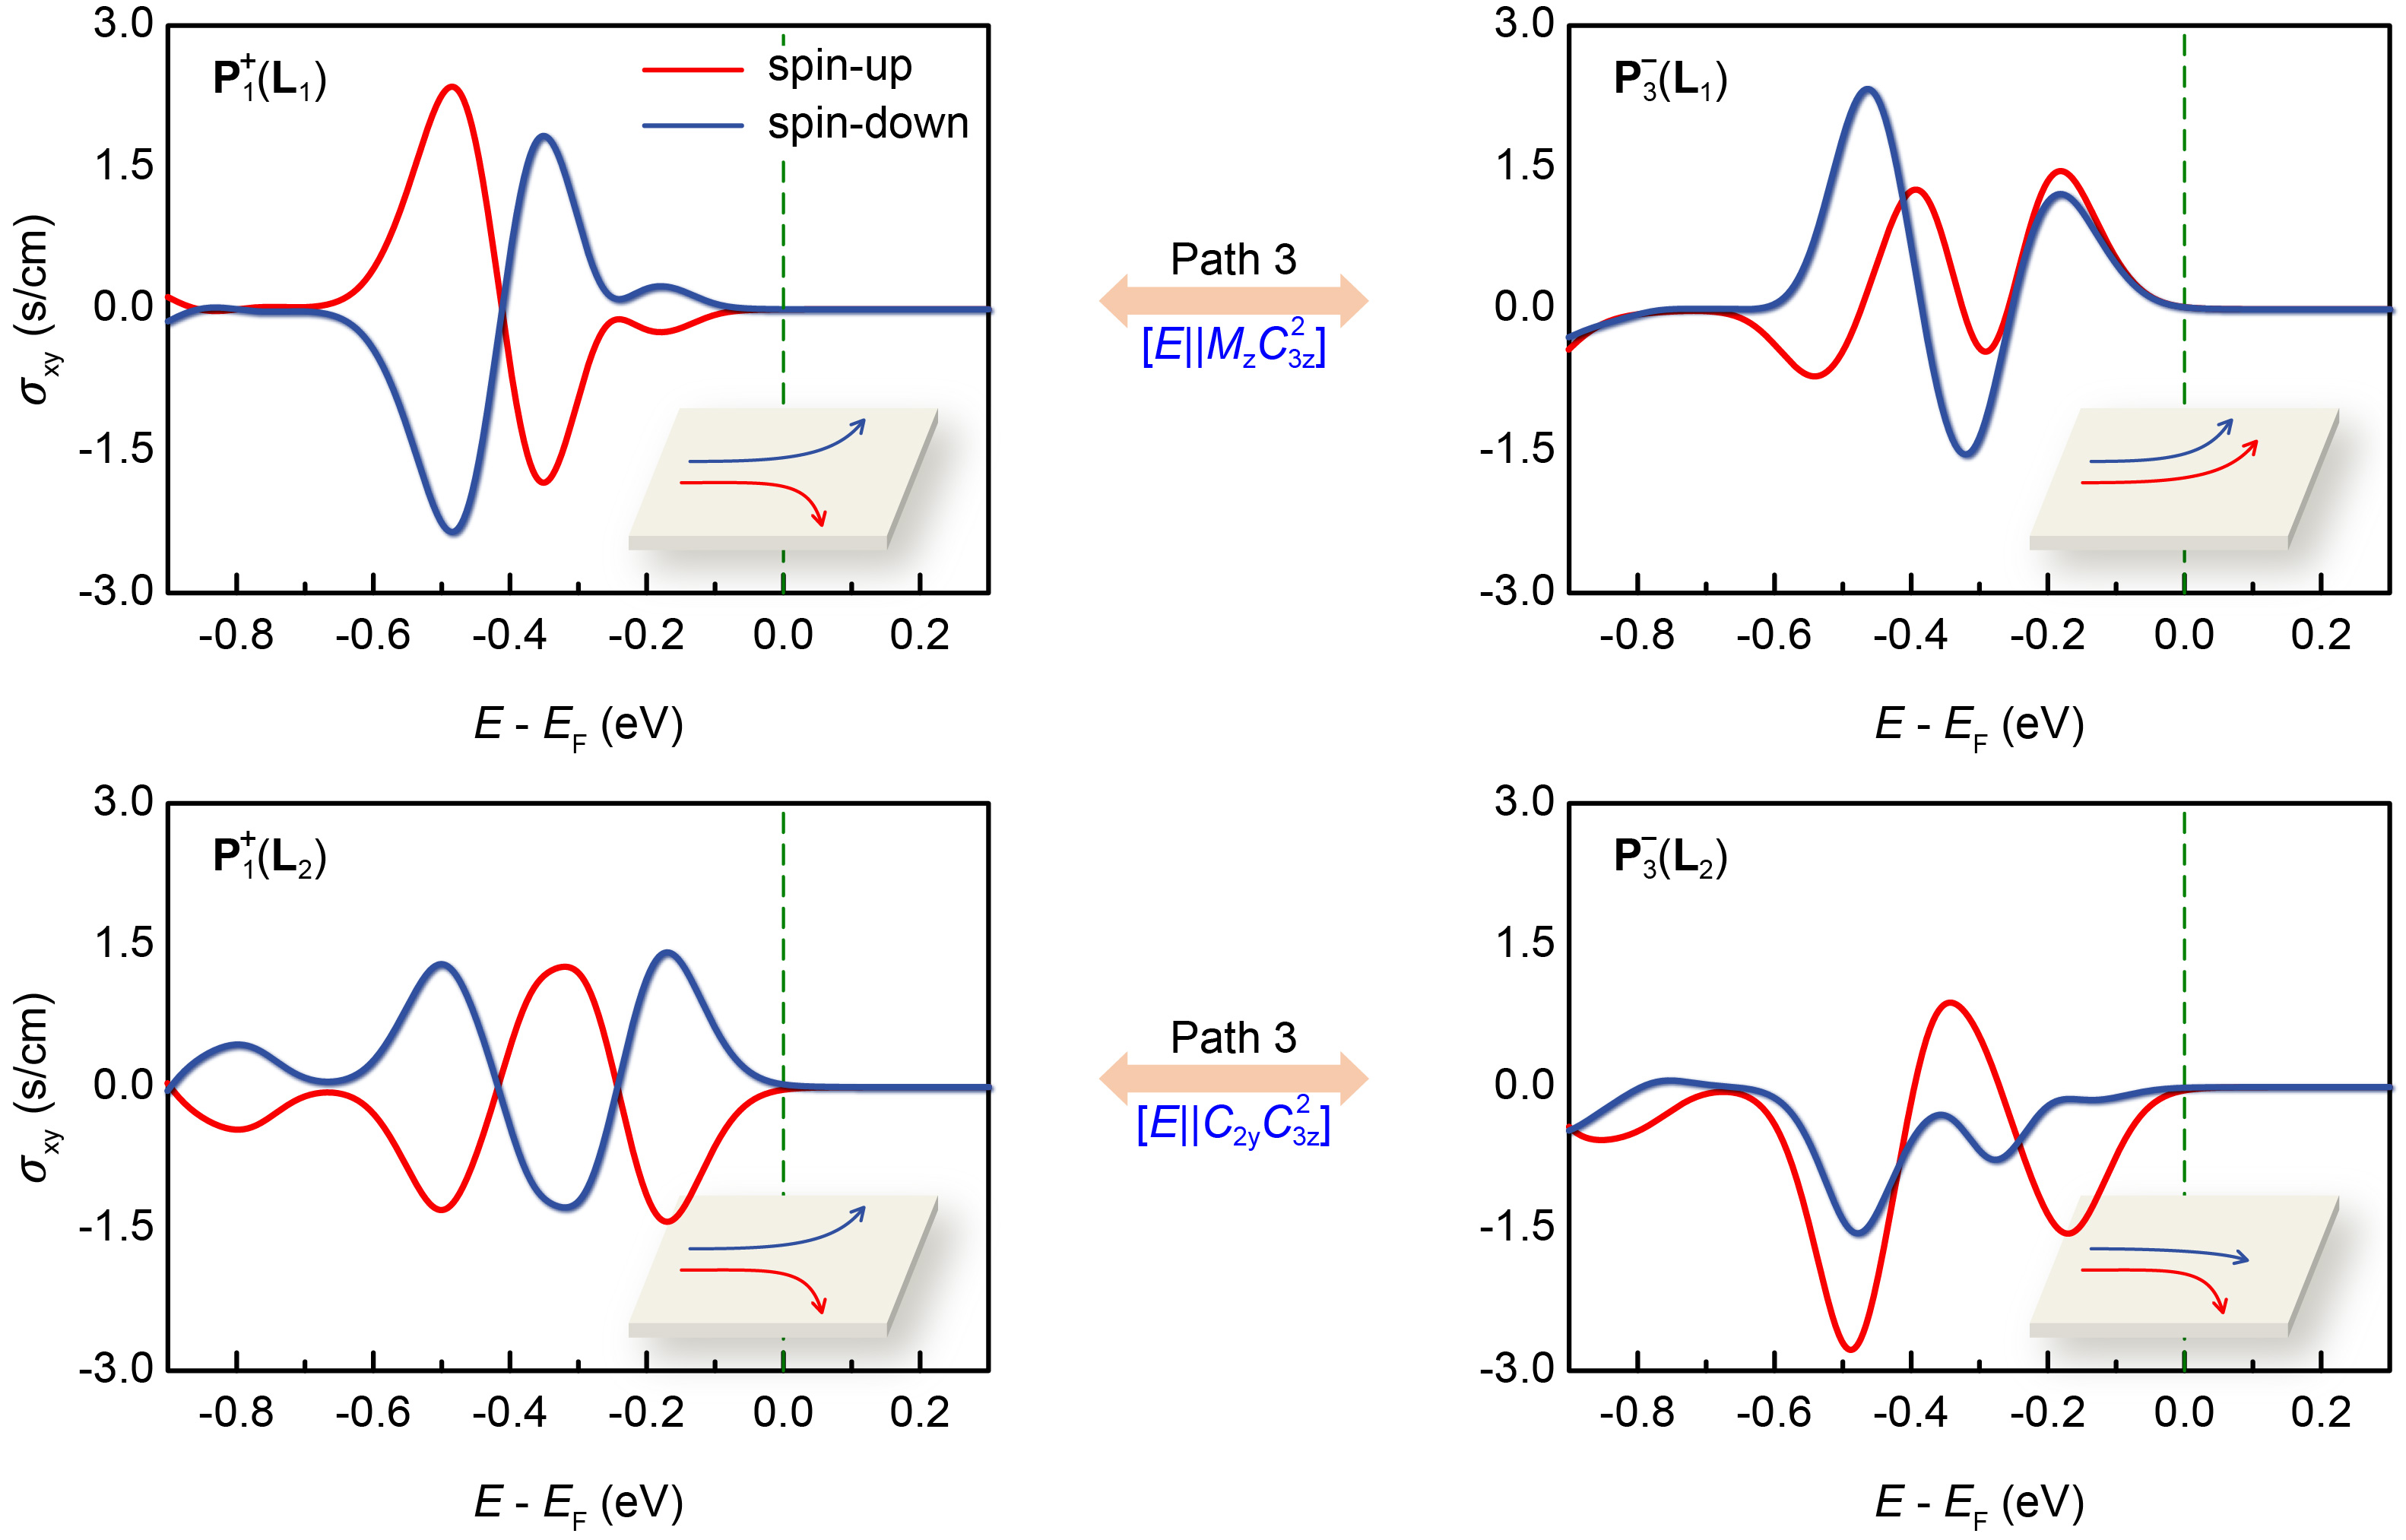


Fig. S5. Switching of the spin-resolved charge conductivity during the ferroelectric transition along Path 3 for the **L**1 and **L**2 magnetic orderings. The additional symmetry rotates the orientation of the mirror plane. When an electric field is applied along the *x*-direction, which is no longer parallel to the rotated mirror plane, the spin-up and spin-down channels consequently lose their correlation in generating transverse Hall currents along the *y*-direction, resulting in a distinct asymmetric electrical response.
